# Supplementary material for: Dissecting kinetic pathways to formation of the fibrillar objects in molecular gels using synchrotron FT-IR
Source: Royal Society of Chemistry journal article supplement (doi:10.1039/c5ce00733j), 2015-01-01
Supplement: c5ce00733j1.pdf [file c5ce00733j1.pdf]

### Supporting Information

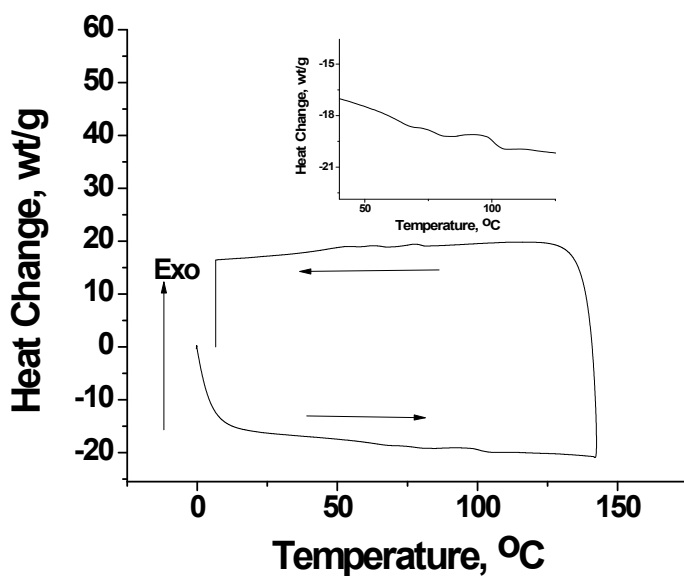

**Figure S1.** DSC thermogram for a fast-cooled 2 wt % **1** in mineral oil gel during 2<sup>nd</sup> heating and cooling cycle. Inset shows expanded region of 40°C- 125 °C in the heating cycle.

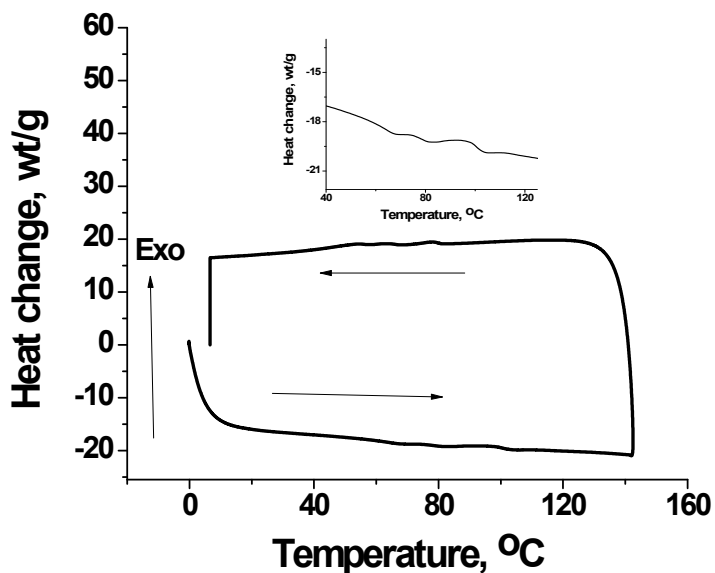

**Figure S2.** DSC thermogram for a fast-cooled 2 wt % **1** in mineral oil gel during 3<sup>rd</sup> heating and cooling cycle. Inset shows expanded region of 40°C- 125 °C in the heating cycle.

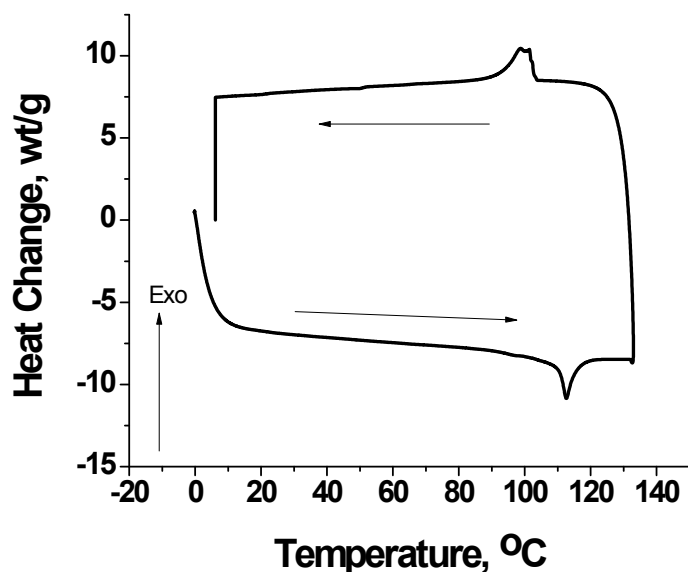

**Figure S3.** DSC thermogram for a fast-cooled 2 wt % **2** in mineral oil gel during 2<sup>nd</sup> heating and cooling cycle.

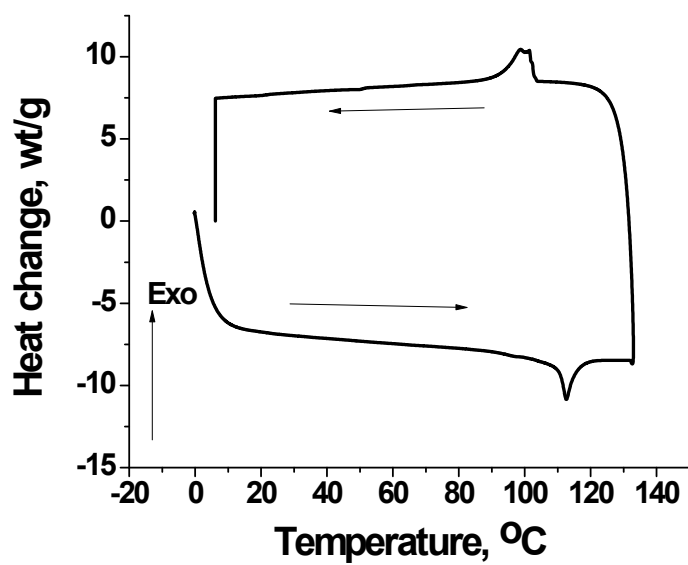

**Figure S4.** DSC thermogram for a fast-cooled 2 wt % **2** in mineral oil gel during 3<sup>rd</sup> heating and cooling cycle.

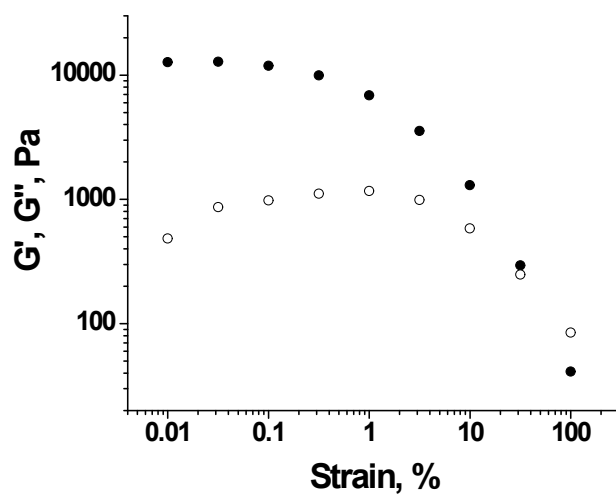

**Figure S5.** Log-log strain sweep (1.0 rad/sec) at 25 °C for a fast-cooled 2 wt % **1** in mineral oil gel:  $G'$ , closed circles;  $G''$ , open circles.

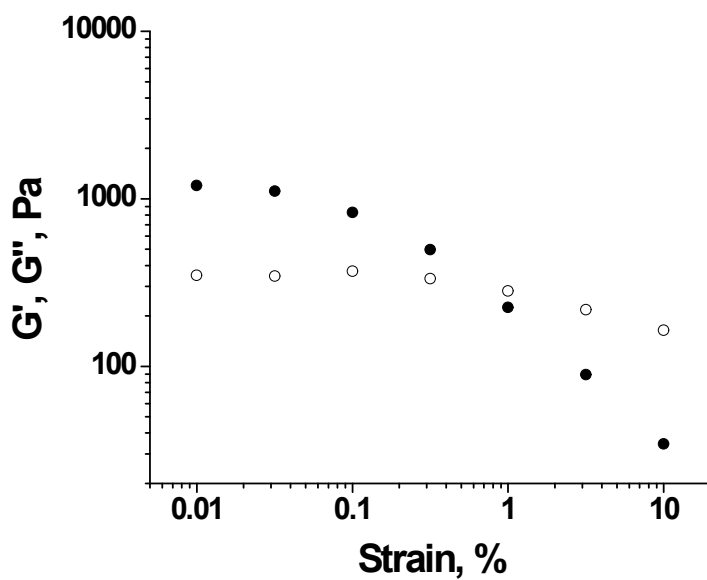

**Figure S6.** Log-log strain sweep (1.0 rad/sec) at 25 °C for a fast-cooled 2 wt % **2** in mineral oil gel:  $G'$ , closed circles;  $G''$ , open circles.

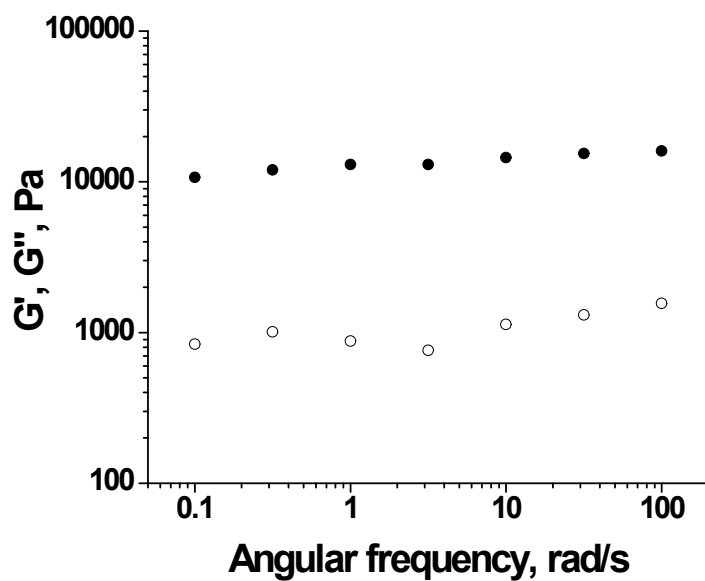

**Figure S7.** Log-log frequency sweep (0.01 % strain) at 25 °C for a fast-cooled 2 wt % **1** in mineral oil gel:  $G'$ , closed circles;  $G''$ , open circles.

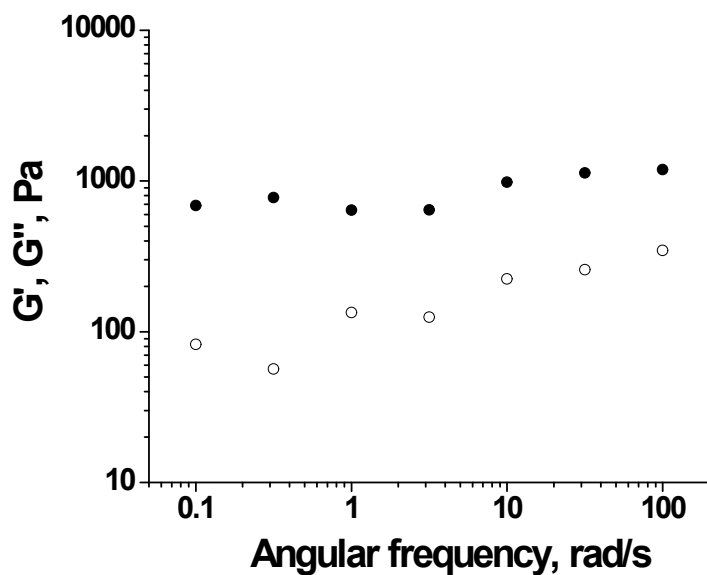

**Figure S8.** Log-log frequency sweep (0.01 % strain) at 25 °C for a fast-cooled 2 wt % **2** in mineral oil gel:  $G'$ , closed circles;  $G''$ , open circles.

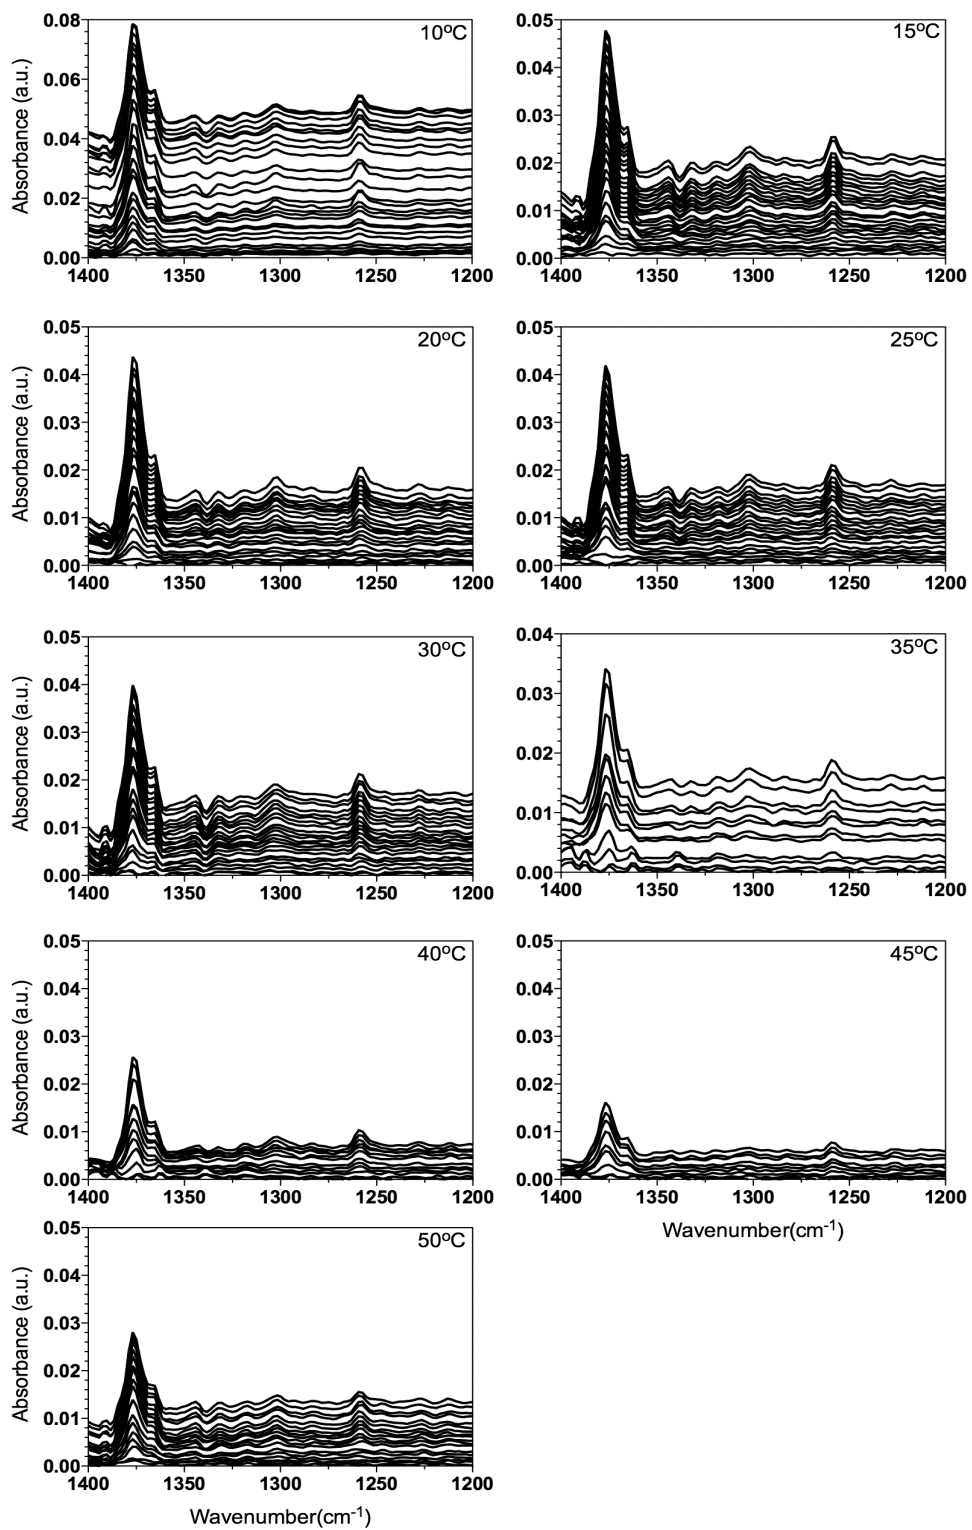

**Figure S9.** Vertically offset FT-IR spectra for the aliphatic CH<sub>3</sub> stretch, using the sol spectra as the baseline, for formation of 2 wt % mineral oil gels of **2** at different temperatures.
